# Supplementary material for: Identification of inherited metabolic diseases patients at Unidade Local de Saúde São João: improving the description of institutional casuistry
Source: Research Square preprint supplement (doi:10.21203/rs.3.rs-6715149/v1), 2025-09-11
Supplement: Supplementary file 1 [file 32e1bee78690d116fd924a0e.docx]

**Table 1.** ICD-9, ICD-10 and ORPHAcode diagnosis codes categorized by pathological group.

| **ICD-9** | |  | **ICD-10** | | | |  | **ORPHAcode** | |
| --- | --- | --- | --- | --- | --- | --- | --- | --- | --- |
| **Code** | **Descriptive** |  | **Code** | **Descriptive** | **Code** | **Descriptive** |  | **Code** | **Name of the subgroup** |
| **Congenital disorder of glycosylation** | | | |  |  |  |  |  |  |
| **2718** | Other specified disorders of carbohydrate transport and metabolism |  | **E778** | Other disorders of glycoprotein metabolism | **E888** | Other specified metabolic disorders |  | **309347** | Disorder of protein N-glycosylation |
| **2727** | Lipidoses |  |  |  |  |  |  | **309447** | Disorder of protein O-glycosylation |
| **27789** | Other specified disorders of metabolism |  |  |  |  |  |  | **309515** | Disorder of glycosphingolipid and glycosylphosphatidylinositol anchor glycosylation |
|  |  |  |  |  |  |  |  | **309526** | Disorder of multiple glycosylation |
| **Lysosomal disease** | |  |  |  |  |  |  |  |  |
| **2775** | Mucopolysaccharidosis |  | **E740** | Glycogen storage disease | **E7527** | Pelizaeus-Merzbacher disease |  | **763** | Pycnodysostosis |
| **3300** | Leukodystrophy |  | **E7400** | Glycogen storage disease, unspecified | **E7528** | Canavan disease |  | **216** | Neuronal ceroid lipofuscinosis |
|  |  |  | **E750** | GM2 gangliosidosis | **E7529** | Other sphingolipidosis |  | **35121** | Lysosomal acid phosphatase deficiency |
|  |  |  | **E7500** | GM2 gangliosidosis, unspecified | **E753** | Sphingolipidosis, unspecified |  | **79207** | Disorder of lysosomal amino acid transport |
|  |  |  | **E7501** | Sandhoff disease | **E754** | Neuronal ceroid lipofuscinosis |  | **79213** | Mucopolysaccharidosis |
|  |  |  | **E7502** | Tay-Sachs disease | **E755** | Other lipid storage disorders |  | **79225** | Sphingolipidosis |
|  |  |  | **E7509** | Other GM2 gangliosidosis | **E756** | Lipid storage disorder, unspecified |  | **309279** | Glycoproteinosis |
|  |  |  | **E751** | Other and unspecified gangliosidosis | **E760** | Mucopolysaccharidosis, type I |  | **309319** | Disorder of sialic acid metabolism |
|  |  |  | **E7510** | Unspecified gangliosidosis | **E7601** | Hurler's syndrome |  | **309337** | Lysosomal glycogen storage disease |
|  |  |  | **E7511** | Mucolipidosis IV | **E7602** | Hurler-Scheie syndrome |  |  |  |
|  |  |  | **E7519** | Other gangliosidosis | **E7603** | Scheie's syndrome |  |  |  |
|  |  |  | **E752** | Other sphingolipidosis | **E761** | Mucopolysaccharidosis, type II |  |  |  |
|  |  |  | **E7521** | Fabry (-Anderson) disease | **E762** | Other mucopolysaccharidoses |  |  |  |
|  |  |  | **E7522** | Gaucher disease | **E76210** | Morquio A mucopolysaccharidoses |  |  |  |
|  |  |  | **E7523** | Krabbe disease | **E76211** | Morquio B mucopolysaccharidoses |  |  |  |
|  |  |  | **E75240** | Niemann-Pick disease type A | **E76219** | Morquio mucopolysaccharidoses, unspecified |  |  |  |
|  |  |  | **E75241** | Niemann-Pick disease type B | **E7622** | Sanfilippo mucopolysaccharidoses |  |  |  |
|  |  |  | **E75242** | Niemann-Pick disease type C | **E763** | Mucopolysaccharidosis, unspecified |  |  |  |
|  |  |  | **E75243** | Niemann-Pick disease type D | **E768** | Other disorders of glucosaminoglycan metabolism |  |  |  |
|  |  |  | **E75244** | Niemann-Pick disease type A/B | **E769** | Glucosaminoglycan metabolism disorder, unspecified |  |  |  |
|  |  |  | **E75248** | Other Niemann-Pick disease | **E770** | Defects in post-translational modification of lysosomal enzymes |  |  |  |
|  |  |  | **E75249** | Niemann-Pick disease, unspecified | **E771** | Defects in glycoprotein degradation |  |  |  |
|  |  |  | **E7525** | Metachromatic leukodystrophy | **E779** | Disorder of glycoprotein metabolism, unspecified |  |  |  |
|  |  |  | **E7526** | Sulfatase deficiency |  |  |  |  |  |
| **Peroxisomal disease** | |  |  |  |  |  |  |  |  |
| **27786** | Peroxisomal disorders |  | **E715** | Peroxisomal disorders | **E71528** | Other X-linked adrenoleukodystrophy |  | **79189** | Peroxisome biogenesis disorder |
|  |  |  | **E7150** | Peroxisomal disorder, unspecified | **E71529** | X-linked adrenoleukodystrophy, unspecified type |  | **309810** | Disorder of peroxisomal alpha-, beta- and omega-oxidation |
|  |  |  | **E71510** | Zellweger syndrome | **E7153** | Other group 2 peroxisomal disorders |  | **369942** | CADDS |
|  |  |  | **E71511** | Neonatal adrenoleukodystrophy | **E71540** | Rhizomelic chondrodysplasia punctata |  | **3276** | Disorder of plasmalogens biosynthesis |
|  |  |  | **E71518** | Other disorders of peroxisome biogenesis | **E71541** | Zellweger-like syndrome |  | **642954** | Autosomal recessive ataxia due to PEX16 deficiency |
|  |  |  | **E71520** | Childhood cerebral X-linked adrenoleukodystrophy | **E71542** | Other group 3 peroxisomal disorders |  | **642965** | Autosomal recessive ataxia due to PEX2 deficiency |
|  |  |  | **E71521** | Adolescent X-linked adrenoleukodystrophy | **E71548** | Other peroxisomal disorders |  | **95433** | Autosomal recessive spinocerebellar ataxia-blindness-deafness syndrome |
|  |  |  | **E71522** | Adrenomyeloneuropathy |  |  |  | **247815** | Autosomal recessive ataxia due to PEX10 deficiency |
| **Disorder of amino acid and other organic acid metabolism** | | | | |  |  |  |  |  |
| **270** | Disorders of amino-acid transport and metabolism |  | **E700** | Classical phenylketonuria | **E720** | Disorders of amino-acid transport |  | **468726** | Severe primary trimethylaminuria |
| **2700** | Disturbances of amino-acid transport |  | **E701** | Other hyperphenylalaninemias | **E7200** | Disorders of amino-acid transport, unspecified |  | **79166** | Disorder of amino acid absorption and transport |
| **2701** | Phenylketonuria [PKU] |  | **E702** | Disorders of tyrosine metabolism | **E7201** | Cystinuria |  | **79167** | Disorder of urea cycle metabolism and ammonia detoxification |
| **2702** | Other disturbances of aromatic amino-acid metabolism |  | **E7020** | Disorder of tyrosine metabolism, unspecified | **E7202** | Hartnup's disease |  | **79173** | Disorder of methionine cycle and sulfur amino acid metabolism |
| **2703** | Disturbances of branched-chain amino-acid metabolism |  | **E7021** | Tyrosinemia | **E7203** | Lowe's syndrome |  | **79181** | Disorder of histidine metabolism |
| **2704** | Disturbances of sulphur-bearing amino-acid metabolism |  | **E7029** | Other disorders of tyrosine metabolism | **E7204** | Cystinosis |  | **79185** | Disorder of ornithine or proline metabolism |
| **2705** | Disturbances of histidine metabolism |  | **E703** | Albinism | **E7209** | Other disorders of amino-acid transport |  | **79187** | Disorder of peptide metabolism |
| **2706** | Disorders of urea cycle metabolism |  | **E70310** | X-linked ocular albinism | **E721** | Disorders of sulfur-bearing amino-acid metabolism |  | **79190** | Disorder of phenylalanin or tyrosine metabolism |
| **2707** | Other disturbances of straight-chain amino-acid metabolism |  | **E70311** | Autosomal recessive ocular albinism | **E7210** | Disorders of sulfur-bearing amino-acid metabolism, unspecified |  | **79194** | Disorder of serine or glycine metabolism |
| **2708** | Other specified disorders of amino-acid metabolism |  | **E70320** | Tyrosinase negative oculocutaneous albinism | **E7211** | Homocystinuria |  | **79196** | Disorder of the gamma-glutamyl cycle |
| **2709** | Unspecified disorder of amino-acid metabolism |  | **E70321** | Tyrosinase positive oculocutaneous albinism | **E7212** | Methylenetetrahydrofolate reductase deficiency |  | **79197** | Disorder of branched-chain amino acid metabolism |
|  |  |  | **E7039** | Other specified albinism | **E7219** | Other disorders of sulfur-bearing amino-acid metabolism |  | **289829** | Disorder of tryptophan metabolism |
|  |  |  | **E704** | Disorders of histidine metabolism | **E722** | Disorders of urea cycle metabolism |  | **289832** | Disorder of lysine and hydroxylysine metabolism |
|  |  |  | **E7040** | Disorders of histidine metabolism, unspecified | **E7220** | Disorder of urea cycle metabolism, unspecified |  | **289841** | Disorder of glutamine metabolism |
|  |  |  | **E7041** | Histidinemia | **E7221** | Argininemia |  | **289899** | Organic aciduria |
|  |  |  | **E7049** | Other disorders of histidine metabolism | **E722** | Arginosuccinic aciduria |  | **308407** | Disorder of beta and omega amino acid metabolism |
|  |  |  | **E705** | Disorders of tryptophan metabolism | **E7223** | Citrullinemia |  | **352728** | Disorder of melanin metabolism |
|  |  |  | **E708** | Other disorders of aromatic amino-acid metabolism | **E7229** | Other disorders of urea cycle metabolism |  | **391381** | Disorder of asparagine metabolism |
|  |  |  | **E7081** | Aromatic L-amino acid decarboxylase deficiency | **E723** | Disorders of lysine and hydroxylysine metabolism |  |  |  |
|  |  |  | **E7089** | Other disorders of aromatic amino-acid metabolism | **E724** | Disorders of ornithine metabolism |  |  |  |
|  |  |  | **E709** | Disorder of aromatic amino-acid metabolism, unspecified | **E725** | Disorders of glycine metabolism |  |  |  |
|  |  |  | **E710** | Maple-syrup-urine disease | **E7250** | Disorder of glycine metabolism, unspecified |  |  |  |
|  |  |  | **E711** | Other disorders of branched-chain amino-acid metabolism | **E7252** | Trimethylaminuria |  |  |  |
|  |  |  | **E71110** | Isovaleric acidemia | **E7253** | Primary hyperoxaluria |  |  |  |
|  |  |  | **E71111** | 3-methylglutaconic aciduria | **E7259** | Other disorders of glycine metabolism |  |  |  |
|  |  |  | **E71118** | Other branched-chain organic acidurias | **E728** | Other specified disorders of amino-acid metabolism |  |  |  |
|  |  |  | **E71120** | Methylmalonic acidemia | **E7281** | Disorders of gamma aminobutyric acid metabolism |  |  |  |
|  |  |  | **E71121** | Propionic acidemia | **E7289** | Other specified disorders of amino-acid metabolism |  |  |  |
|  |  |  | **E71128** | Other disorders of propionate metabolism | **E729** | Disorder of amino-acid metabolism, unspecified |  |  |  |
|  |  |  | **E7119** | Other disorders of branched-chain amino-acid metabolism |  |  |  |  |  |
|  |  |  | **E712** | Disorder of branched-chain amino-acid metabolism, unspecified |  |  |  |  |  |
| **Disorder of carbohydrate metabolism** | | | |  |  |  |  |  |  |
| **271** | Disorders of carbohydrate transport and metabolism |  | **E730** | Congenital lactase deficiency | **E7421** | Galactosemia |  | **79177** | Gluconeogenesis disorder |
| **2710** | Glycogenosis |  | **E7401** | Von Gierke disease | **E7429** | Other disorders of galactose metabolism |  | **79179** | Disorder of glycerol metabolism |
| **2711** | Galactosemia |  | **E7402** | Pompe disease | **E743** | Other disorders of intestinal carbohydrate absorption |  | **79201** | Glycogen storage disease |
| **2712** | Hereditary fructose intolerance |  | **E7403** | Cori disease | **E7431** | Sucrase-isomaltase deficiency |  | **308459** | Disorder of glycolysis |
| **2718** | Other specified disorders of carbohydrate transport and metabolism |  | **E7404** | McArdle disease | **E748** | Other specified disorders of carbohydrate metabolism |  | **308463** | Disorder of fructose metabolism |
| **2719** | Unspecified disorder of carbohydrate transport and metabolism |  | **E7405** | Lysosome-associated membrane protein 2 [LAMP2] deficiency | **E74810** | Glucose transporter protein type 1 deficiency |  | **308467** | Disorder of galactose metabolism |
|  |  |  | **E7409** | Other glycogen storage disease | **E74818** | Other disorders of glucose transport |  | **308998** | Disorder of glyoxylate metabolism |
|  |  |  | **E741** | Disorders of fructose metabolism | **E74819** | Disorders of glucose transport, unspecified |  | **309001** | Disorder of carbohydrate absorption and transport |
|  |  |  | **E7410** | Disorder of fructose metabolism, unspecified | **E74820** | SLC13A5 Citrate Transporter Disorder |  | **440701** | Disorders of pentose/polyol metabolism |
|  |  |  | **E7411** | Essential fructosuria | **E74829** | Other disorders of citrate metabolism |  |  |  |
|  |  |  | **E7412** | Hereditary fructose intolerance | **E7489** | Other specified disorders of carbohydrate metabolism |  |  |  |
|  |  |  | **E742** | Disorders of galactose metabolism | **E749** | Disorder of carbohydrate metabolism, unspecified |  |  |  |
|  |  |  | **E7420** | Disorders of galactose metabolism, unspecified |  |  |  |  |  |
| **Disorder of energy metabolism** | |  |  |  |  |  |  |  |  |
| **27781** | Primary carnitine deficiency |  | **E713** | Disorders of fatty-acid metabolism | **E7140** | Disorder of carnitine metabolism, unspecified |  | **68380** | Mitochondrial disease |
| **27782** | Carnitine deficiency due to inborn errors of metabolism |  | **E7130** | Disorder of fatty-acid metabolism, unspecified | **E7141** | Primary carnitine deficiency |  | **79172** | Creatine deficiency syndrome |
| **27785** | Disorders of fatty acid oxidation |  | **E71310** | Long chain/very long chain acyl CoA dehydrogenase deficiency | **E7142** | Carnitine deficiency due to inborn errors of metabolism |  | **79174** | Disorder of fatty acid oxidation and ketone body metabolism |
| **27787** | Disorders of mitochondrial metabolism |  | **E71311** | Medium chain acyl CoA dehydrogenase deficiency | **E7144** | Other secondary carnitine deficiency |  | **254746** | Pyruvate metabolism disorder |
|  |  |  | **E71312** | Short chain acyl CoA dehydrogenase deficiency | **E744** | Disorders of pyruvate metabolism and gluconeogenesis |  | **254749** | Tricarboxylic acid cycle disorder |
|  |  |  | **E71313** | Glutaric aciduria type II | **E884** | Mitochondrial metabolism disorders |  |  |  |
|  |  |  | **E71314** | Muscle carnitine palmitoyltransferase deficiency | **E8840** | Mitochondrial metabolism disorder, unspecified |  |  |  |
|  |  |  | **E71318** | Other disorders of fatty-acid oxidation | **E8841** | MELAS syndrome |  |  |  |
|  |  |  | **E7132** | Disorders of ketone metabolism | **E8842** | MERRF syndrome |  |  |  |
|  |  |  | **E7139** | Other disorders of fatty-acid metabolism | **E8843** | Disorders of mitochondrial tRNA synthetases |  |  |  |
|  |  |  | **E714** | Disorders of carnitine metabolism | **E8849** | Other mitochondrial metabolism disorders |  |  |  |
| **Disorder of biogenic amine metabolism and transport** | | | | |  |  |  |  |  |
| 277 | Other specified disorders of metabolism |  | **E701** | Other hyperphenylalaninemias | **E728** | Other specified disorders of amino-acid metabolism |  | **79169** | Disorder of neurotransmitter metabolism and transport |
|  |  |  | **E708** | Other disorders of aromatic amino-acid metabolism | **E880** | Disorders of plasma-protein metabolism, not elsewhere classified |  | **79175** | Disorder of gamma-aminobutyric acid metabolism |
|  |  |  |  |  |  |  |  | **79192** | Disorder of pyridoxine metabolism |
|  |  |  |  |  |  |  |  | **79219** | Metabolic disease involving other neurotransmitter deficiency |
| **Disorder of purine or pyrimidine metabolism** | | | | |  |  |  |  |  |
| **2772** | Other disorders of purine and pyrimidine metabolism |  | **E791** | Lesch-Nyhan syndrome | **E7982** | Hereditary xanthinuria |  | **79191** | Disorder of purine metabolism |
|  |  |  | **E792** | Myoadenylate deaminase deficiency | **E7989** | Other specified disorders of purine and pyrimidine metabolism |  | **79193** | Disorder of pyrimidine metabolism |
|  |  |  | **E798** | Other disorders of purine and pyrimidine metabolism | **E799** | Disorder of purine and pyrimidine metabolism, unspecified |  |  |  |
| **Disorder of lipid metabolism** | | |  |  |  |  |  |  |  |
| **2727** | Lipidoses |  | **E7801** | Familial hypercholesterolemia | **E7879** | Other disorders of bile acid and cholesterol metabolism |  | **79226** | Sterol metabolism disorder |
|  |  |  | **E7871** | Barth syndrome | **E789** | Disorder of lipoprotein metabolism, unspecified |  | **101953** | Rare dyslipidemia |
|  |  |  | **E7872** | Smith-Lemli-Opitz syndrome |  |  |  | **309028** | Disorder of lipid absorption and transport |
|  |  |  |  |  |  |  |  | **352301** | Disorder of phospholipids, sphingolipids and fatty acids biosynthesis |
|  |  |  |  |  |  |  |  | **461** | Recessive X-linked ichthyosis |
| **Disorder of lysosomal-related organelles** | | | | |  |  |  |  |  |
| **2727** | Lipidoses |  | **E703** | Albinism |  |  |  | **167** | Chédiak-Higashi syndrome |
|  |  |  |  |  |  |  |  | **678** | Papillon-Lefèvre syndrome |
|  |  |  |  |  |  |  |  | **2342** | Haim-Munk syndrome |
|  |  |  |  |  |  |  |  | **79430** | Hermansky-Pudlak syndrome |
|  |  |  |  |  |  |  |  | **675782** | Progressive hypotonia-intellectual disability-facial dysmorphism syndrome due to FYVE-defective RBSN |
| **Disorder of porphyrin and heme metabolism** | | | | |  |  |  |  |  |
| **2771** | Disorders of porphyrin metabolism |  | **E800** | Hereditary erythropoietic porphyria | **E803** | Defects of catalase and peroxidase |  | **738** | Porphyria |
|  |  |  | **E801** | Porphyria cutanea tarda | **E804** | Gilbert syndrome |  | **75563** | X-linked sideroblastic anemia |
|  |  |  | **E802** | Other and unspecified porphyria | **E805** | Crigler-Najjar syndrome |  | **309816** | Disorder of bilirubin metabolism and excretion |
|  |  |  | **E8020** | Unspecified porphyria |  |  |  | **562509** | Heme oxygenase-1 deficiency |
|  |  |  | **E8021** | Acute intermittent (hepatic) porphyria |  |  |  |  |  |
|  |  |  | **E8029** | Other porphyria |  |  |  |  |  |
| **Disorder of metabolite absorption and transport** | | | | |  |  |  |  |  |
| **27501** | Hereditary hemochromatosis |  | **E8300** | Disorder of copper metabolism, unspecified | **E83110** | Hereditary hemochromatosis |  | **309827** | Disorder of vitamin and non-protein cofactor absorption and transport |
| **2751** | Disorders of copper metabolism |  | **E8301** | Wilson's disease | **E8331** | Familial hypophosphatemia |  | **309836** | Disorder of mineral absorption and transport |
|  |  |  | **E8309** | Other disorders of copper metabolism |  |  |  |  |  |
| **Osteogenesis imperfecta** | |  |  |  |  |  |  |  |  |
| **75651** | Osteogenesis imperfecta |  | **Q780** | Osteogenesis imperfecta |  |  |  | **666** | Osteogenesis imperfecta |
| **Other metabolic disease** | |  |  |  |  |  |  |  |  |
| **2734** | Alpha-1-antitrypsin deficiency |  | **E8801** | Alpha-1-antitrypsin deficiency |  |  |  | **657** | Congenital isolated hyperinsulinism |
| **277** | Other and unspecified disorders of metabolism |  | **E888** | Other specified metabolic disorders |  |  |  | **60** | Alpha-1-antitrypsin deficiency |
| **2776** | Other deficiencies of circulating enzymes |  | **E889** | Metabolic disorder, unspecified |  |  |  | **714** | Hemolytic anemia due to diphosphoglycerate mutase deficiency |
| **2778** | Other specified disorders of metabolism |  |  |  |  |  |  | **79345** | Brachytelephalangic chondrodysplasia punctata |
| **27789** | Other specified disorders of metabolism |  |  |  |  |  |  | **79507** | Hypotonia-failure to thrive-microcephaly syndrome |
|  |  |  |  |  |  |  |  | **99845** | Genetic recurrent myoglobinuria |
|  |  |  |  |  |  |  |  | **99846** | Autosomal dominant myoglobinuria |
|  |  |  |  |  |  |  |  | **404454** | Alacrimia-choreoathetosis-liver dysfunction syndrome |
|  |  |  |  |  |  |  |  | **555402** | NAD(P)HX dehydratase deficiency |
|  |  |  |  |  |  |  |  | **555407** | NAD(P)HX epimerase deficiency |

**Note**: All codes from the Orphanet chapter entitled “*Rare Inborn Errors of Metabolism”* were included in the search. Due to the large number of specific codes, only the name of each subgroup was indicated
